# Supplementary figures and images for: Msd1/SSX2IP-dependent microtubule anchorage ensures spindle orientation and primary cilia formation
Source: PubMed Central journal article supplement — EMBO Rep. 2014 Jan 7;15(2):175–84. doi: 10.1002/embr.201337929 (PMC3989863; doi:10.1002/embr.201337929), 2014-01-07

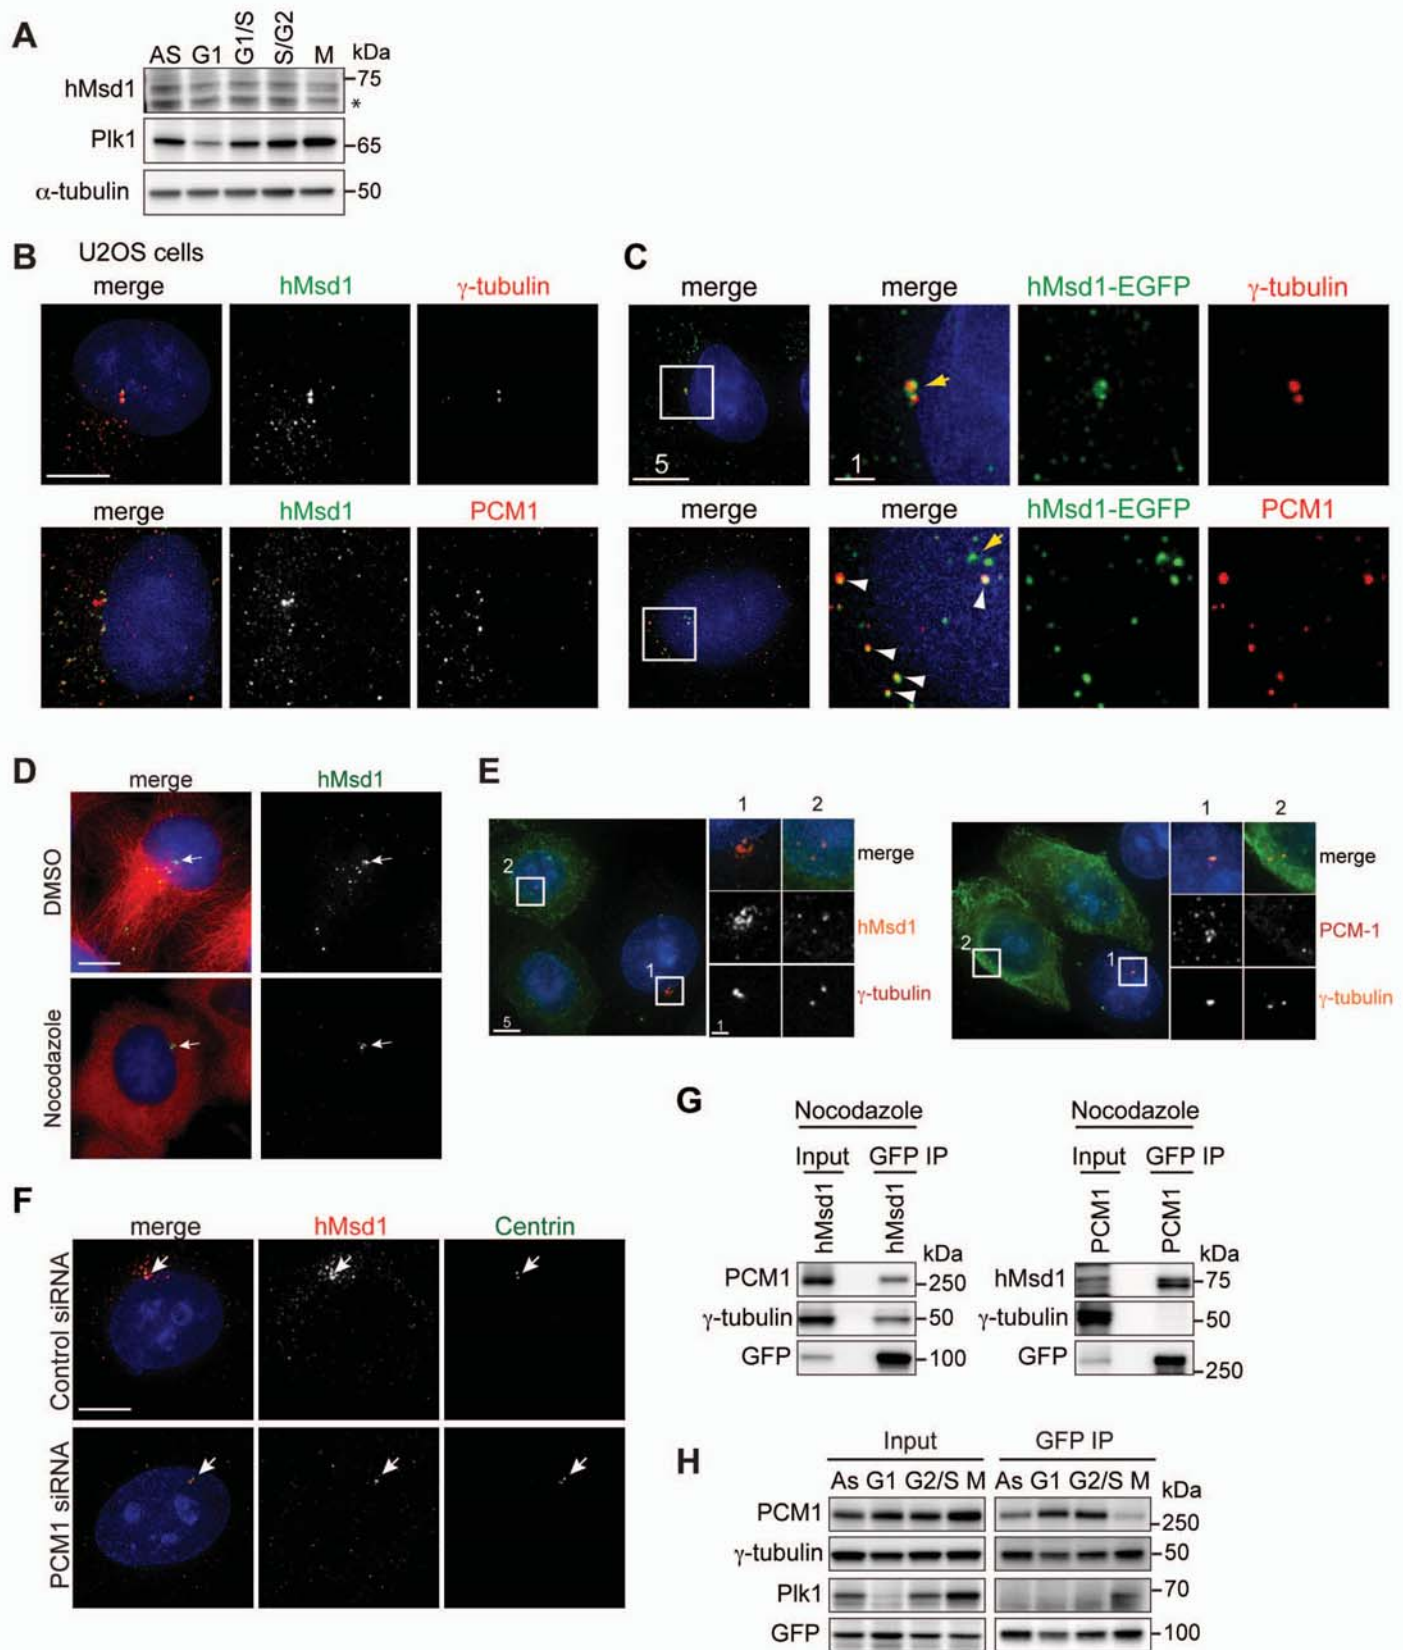

Supplement: embr0015-0175-sd3.pdf [file embr0015-0175-sd3.pdf]

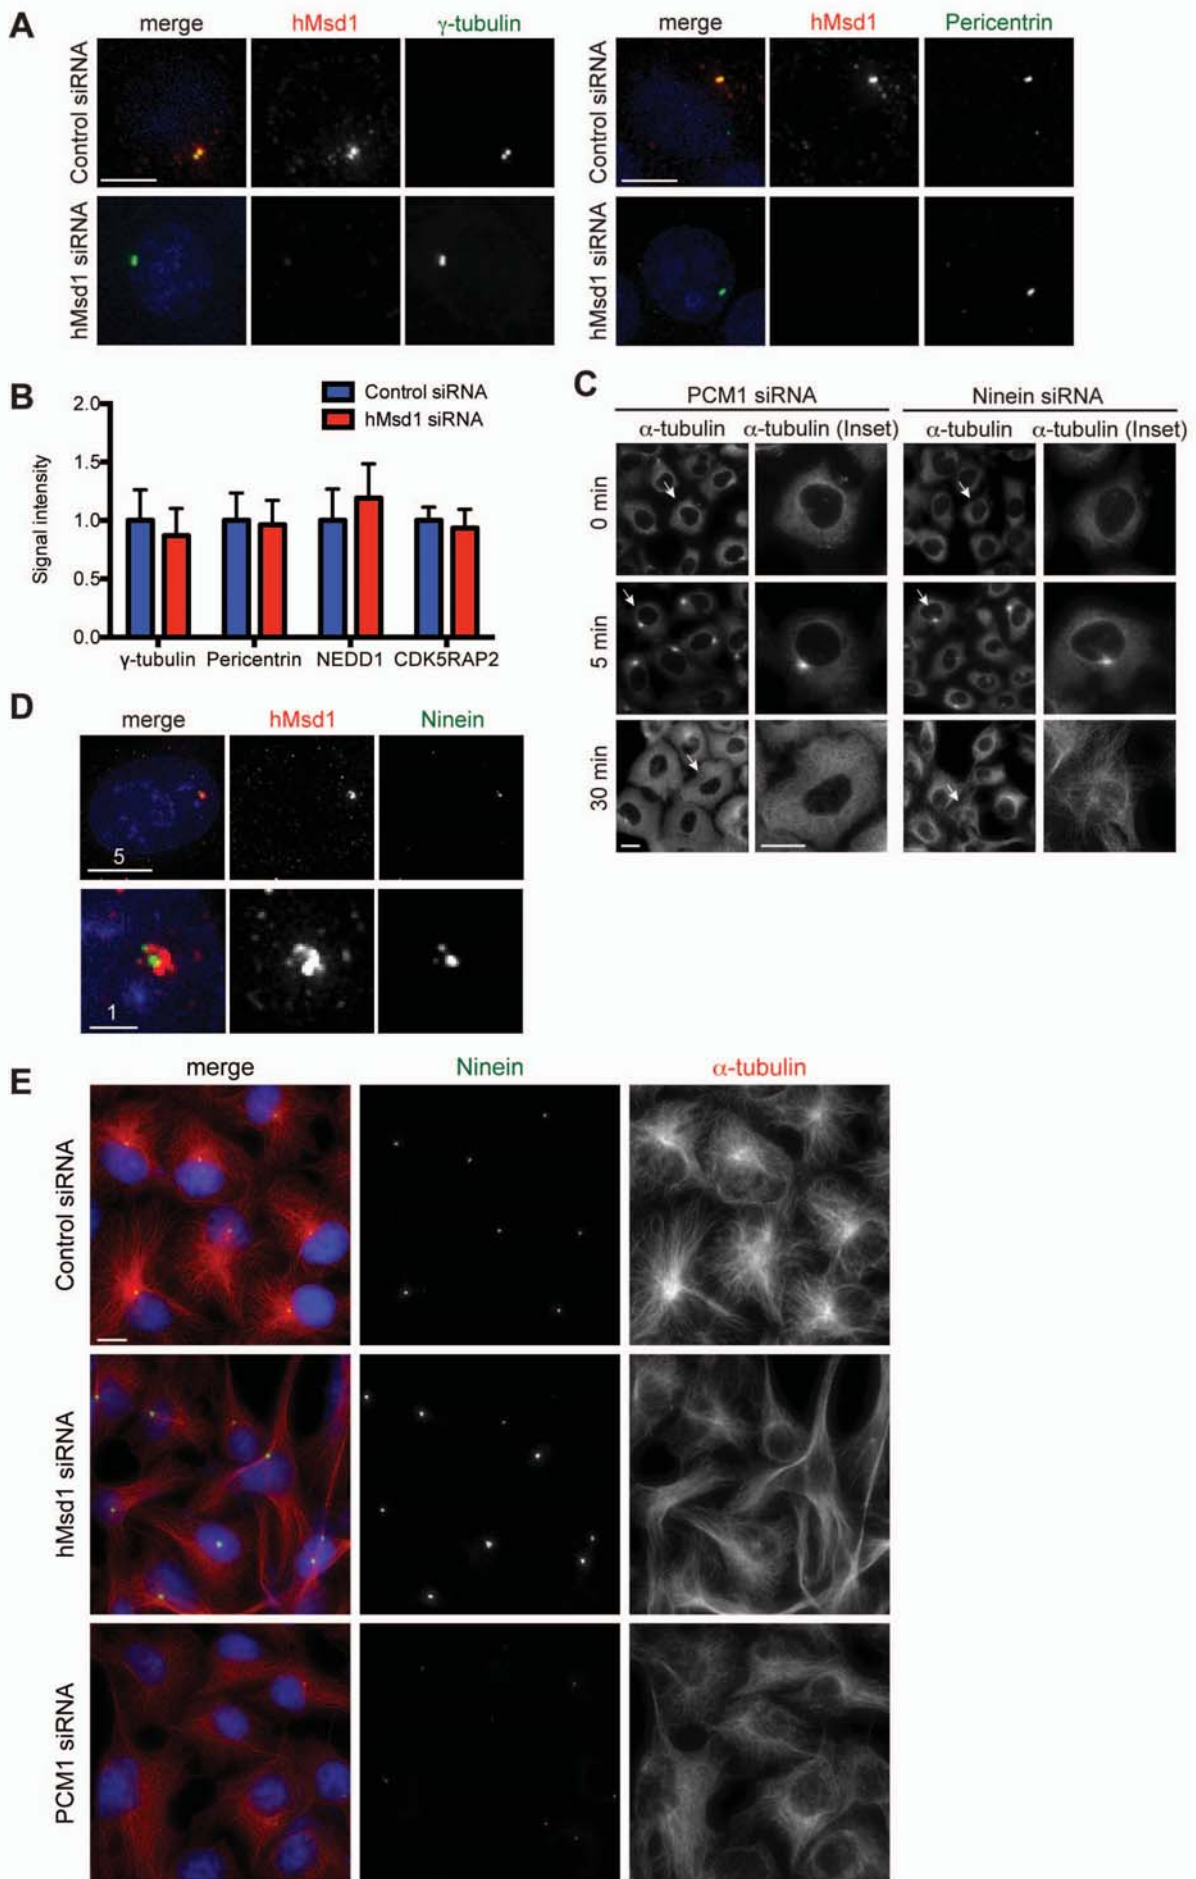

Supplement: embr0015-0175-sd4.pdf [file embr0015-0175-sd4.pdf]

**A**

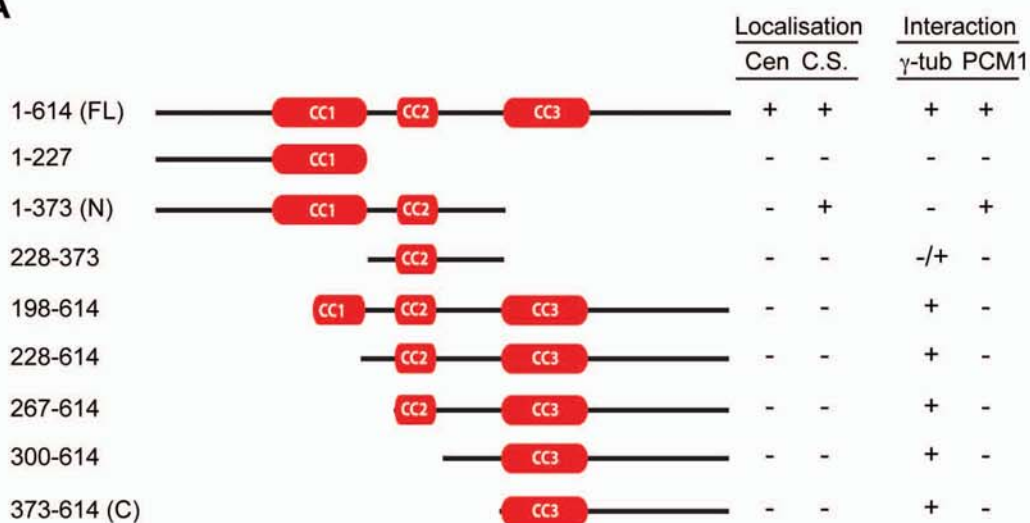

**B**

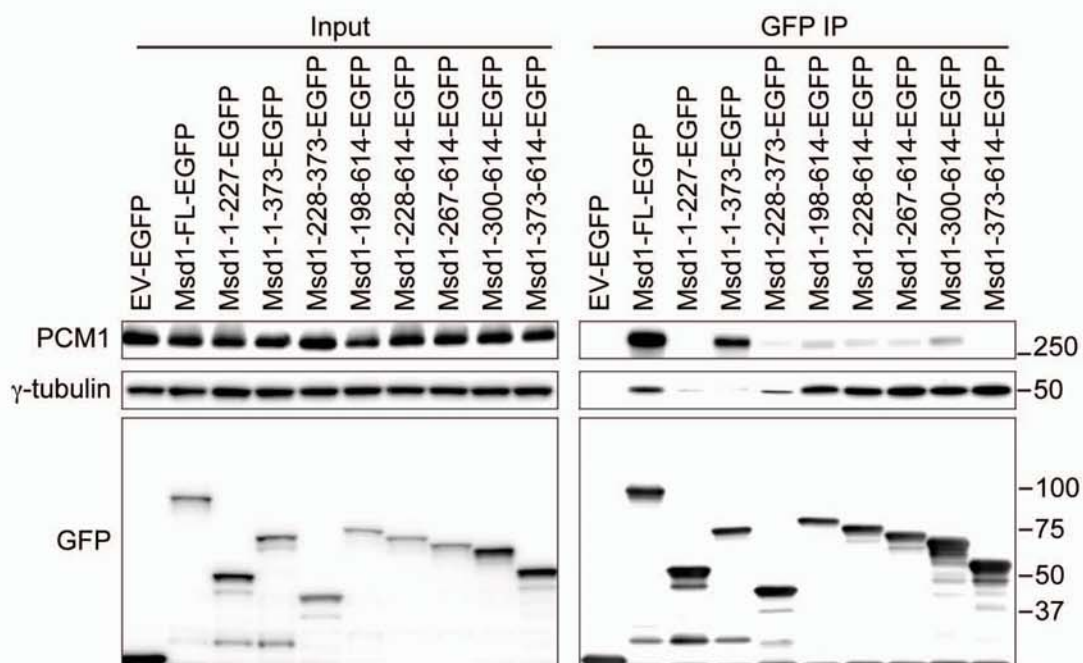

Supplement: embr0015-0175-sd5.pdf [file embr0015-0175-sd5.pdf]

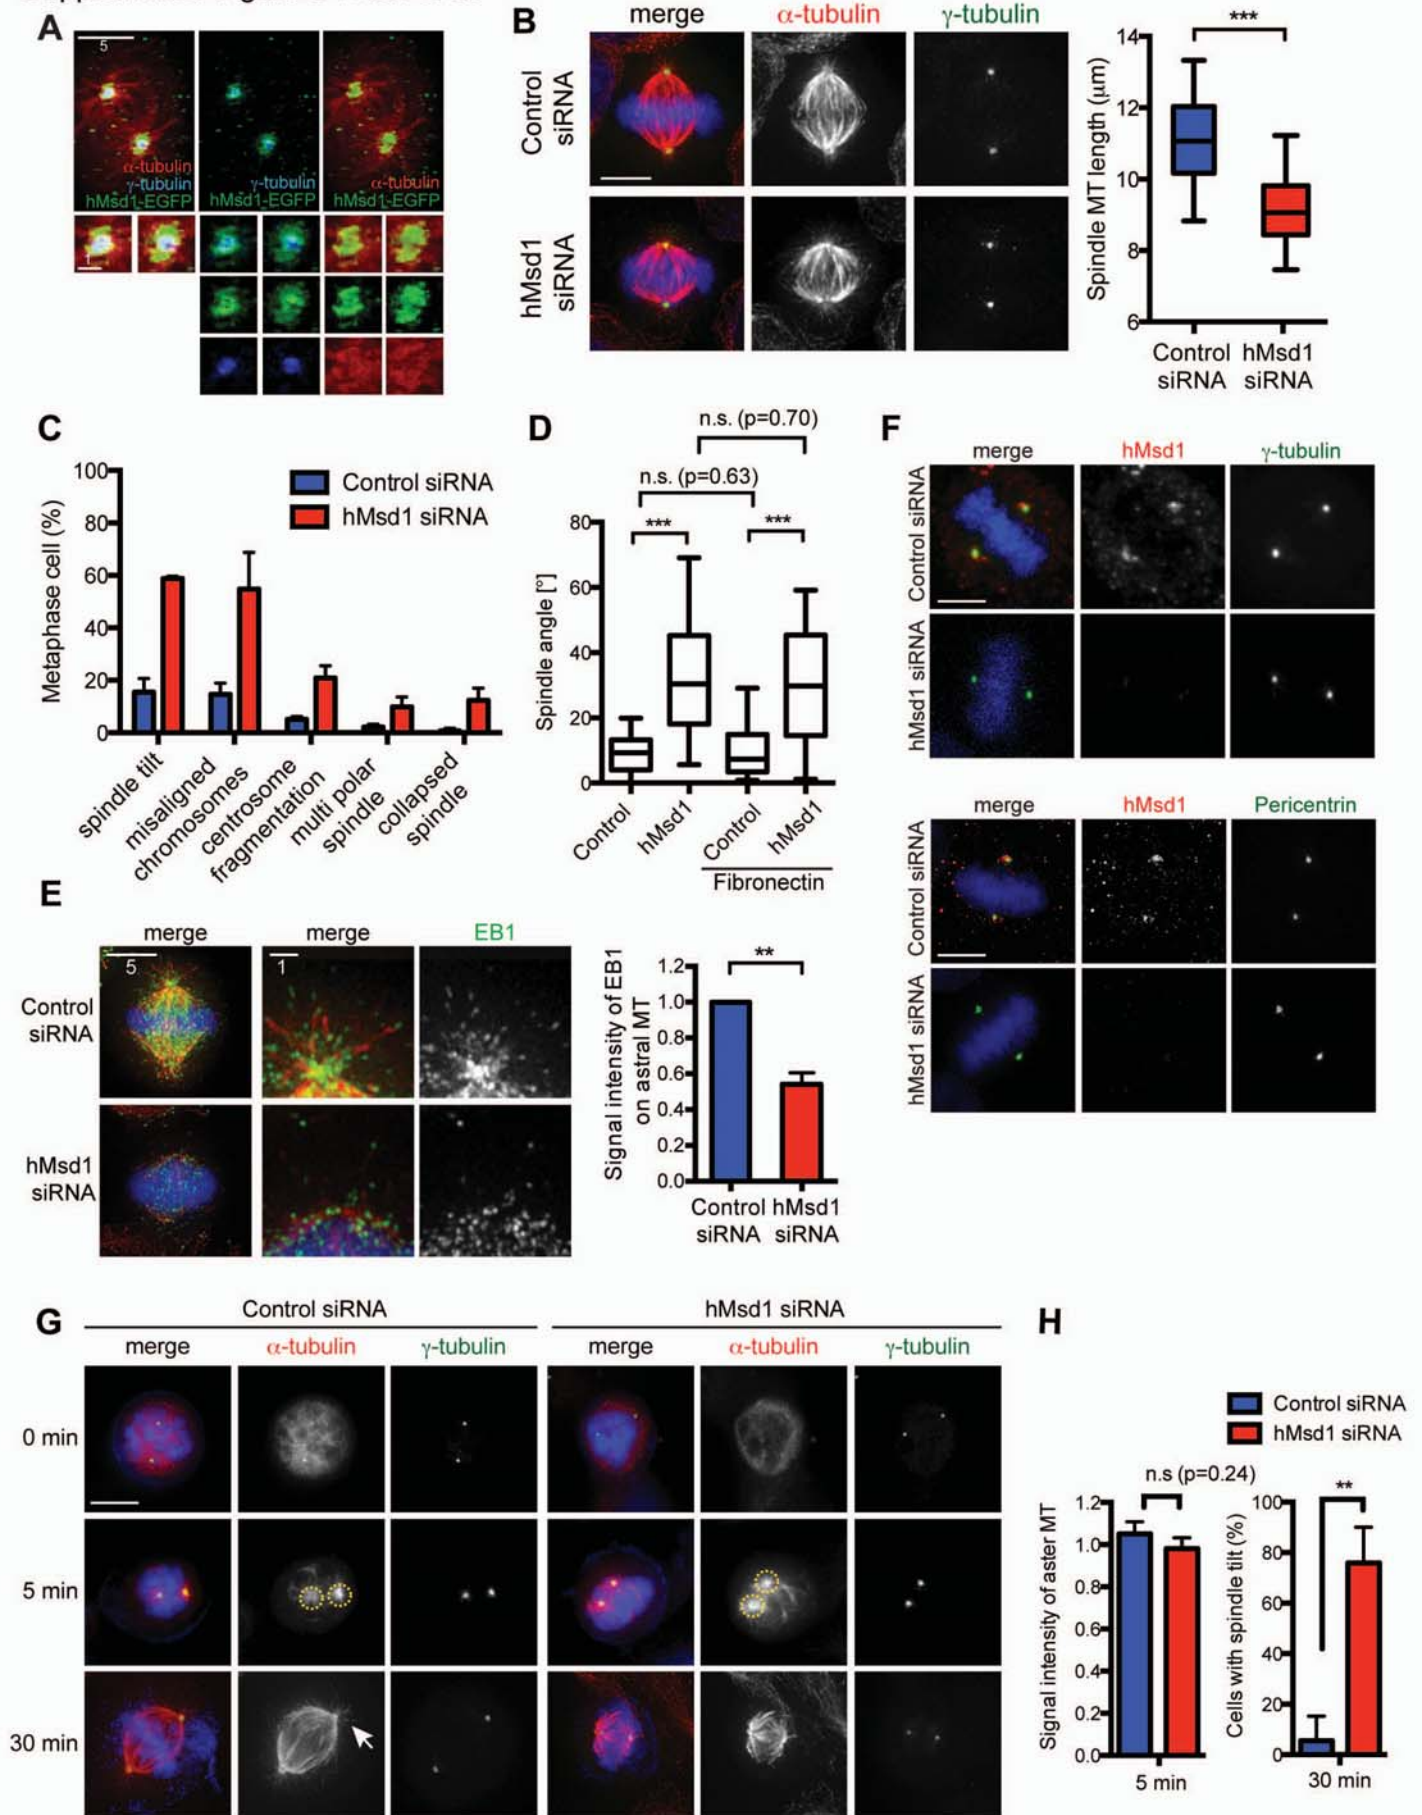

Supplement: embr0015-0175-sd6.pdf [file embr0015-0175-sd6.pdf]

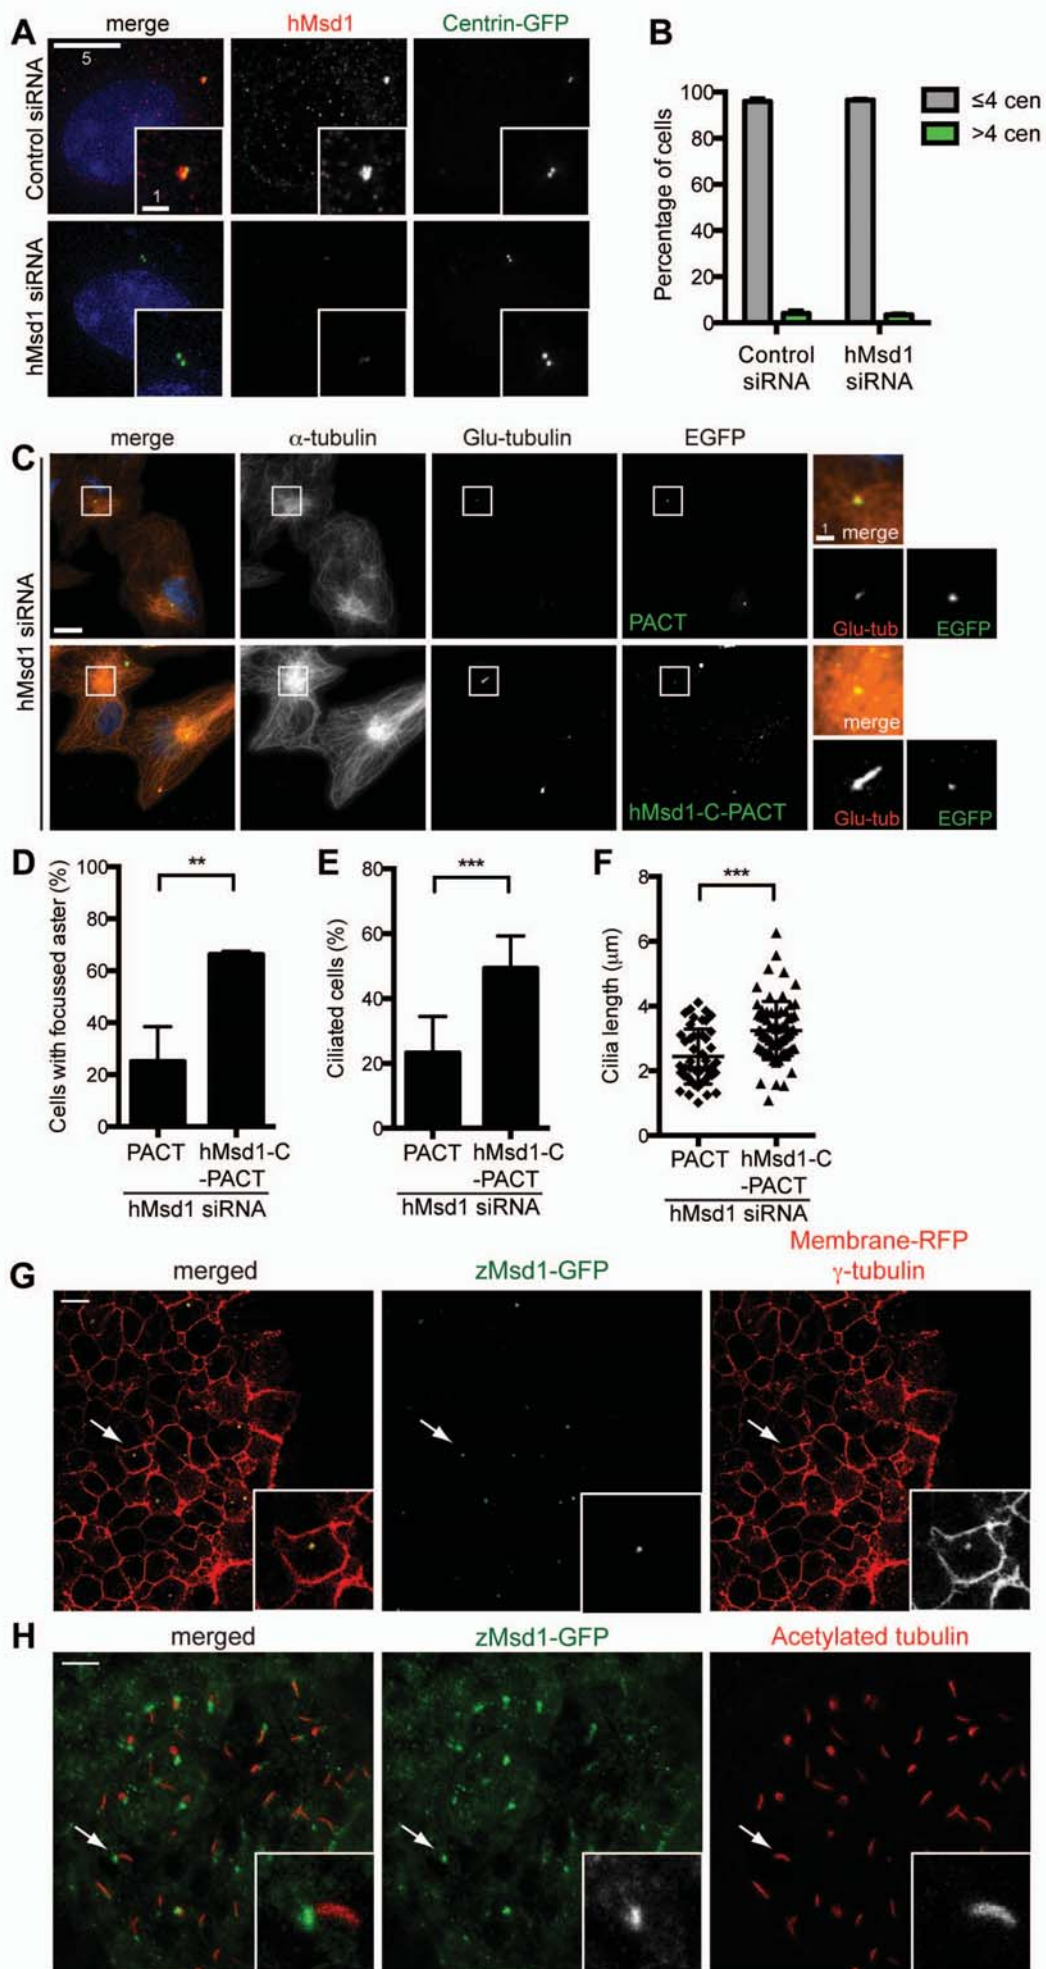

Supplement: embr0015-0175-sd7.pdf [file embr0015-0175-sd7.pdf]

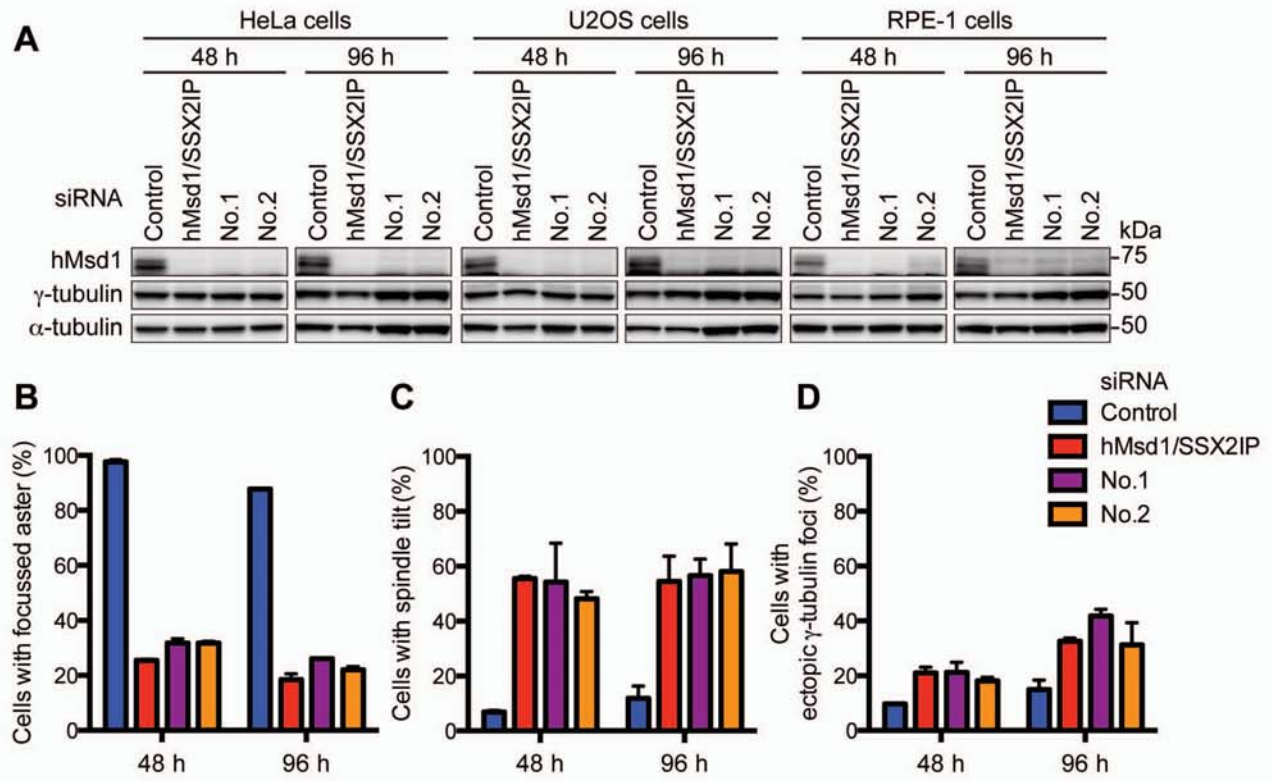

Supplement: embr0015-0175-sd8.pdf [file embr0015-0175-sd8.pdf]
